# Supplementary material for: Special structural and dynamical interplay of cyano-based novel deep eutectic solvents
Source: Royal Society of Chemistry journal article supplement (doi:10.1039/d2nj05274a), 2023-01-01
Supplement: d2nj05274a1.pdf [file d2nj05274a1.pdf]

Supporting Information

## **Special structural and dynamical interplay of cyano-based novel deep eutectic solvent**

Chen Fan <sup>a,\*</sup>, Yuwei Shan <sup>a</sup>, Yaqi Yin <sup>a</sup>, Xueli Cao <sup>a,\*</sup>

<sup>a</sup> Beijing Advanced Innovation Center for Food Nutrition and Human Health, Beijing Technology and Business University, Beijing 100048, China

\* Corresponding author: NO. 11 Fucheng Road, Beijing Technology and Business University, Beijing, China, 100048

Telephone number: 86-010-68984898 (FAX)

Email: fanchen@btbu.edu.cn

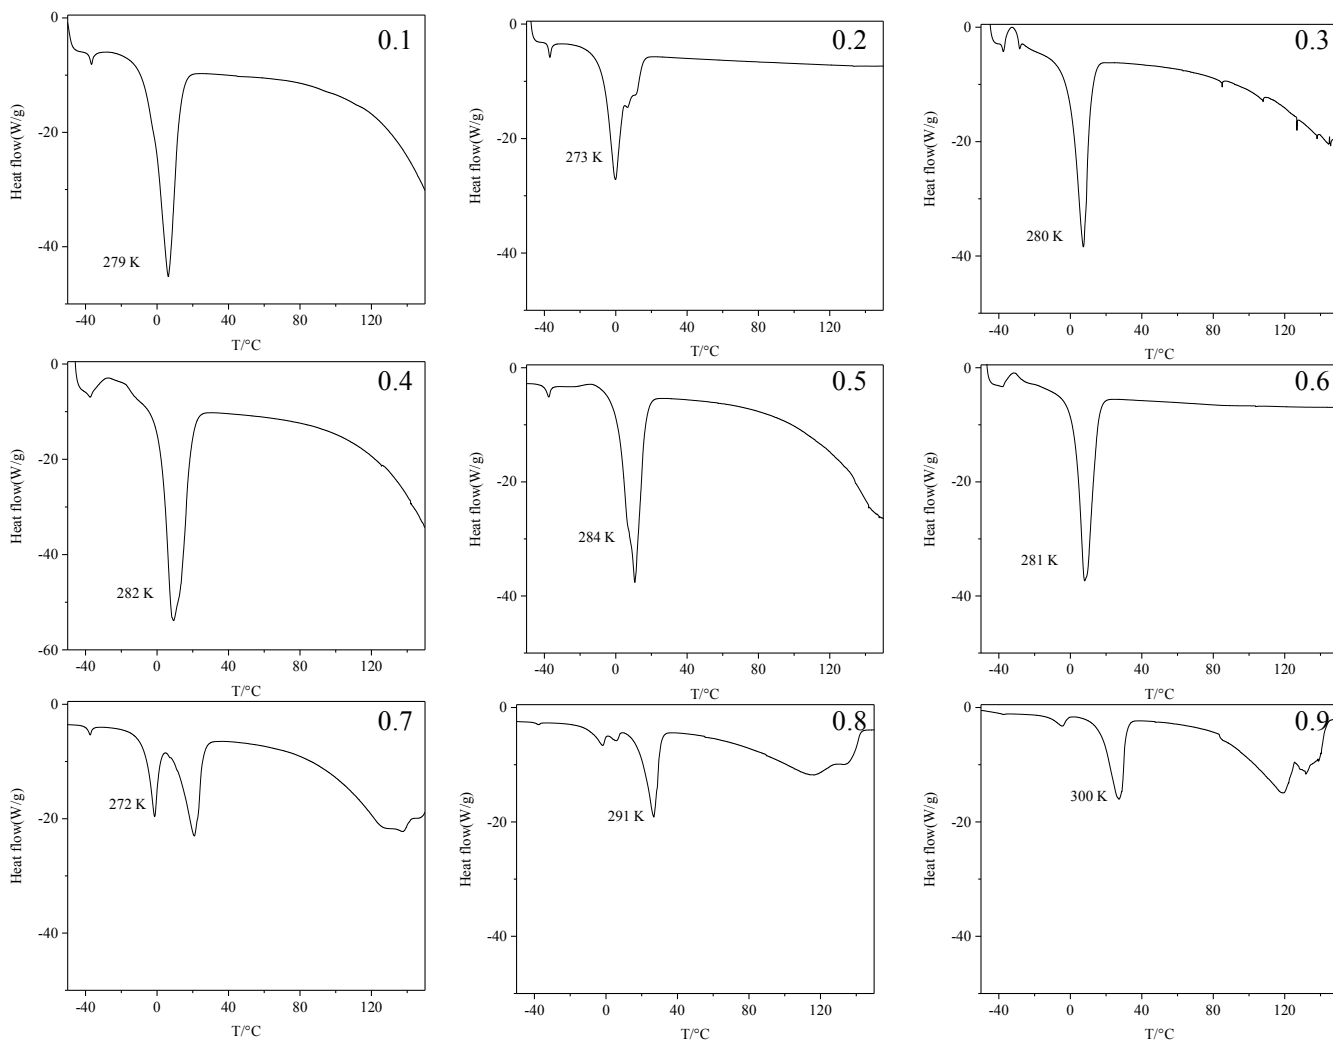

**Figure S1.** DSC curves of 3-bromobenzonitrile-levulinic acid system with different levulinic acid mole fractions.

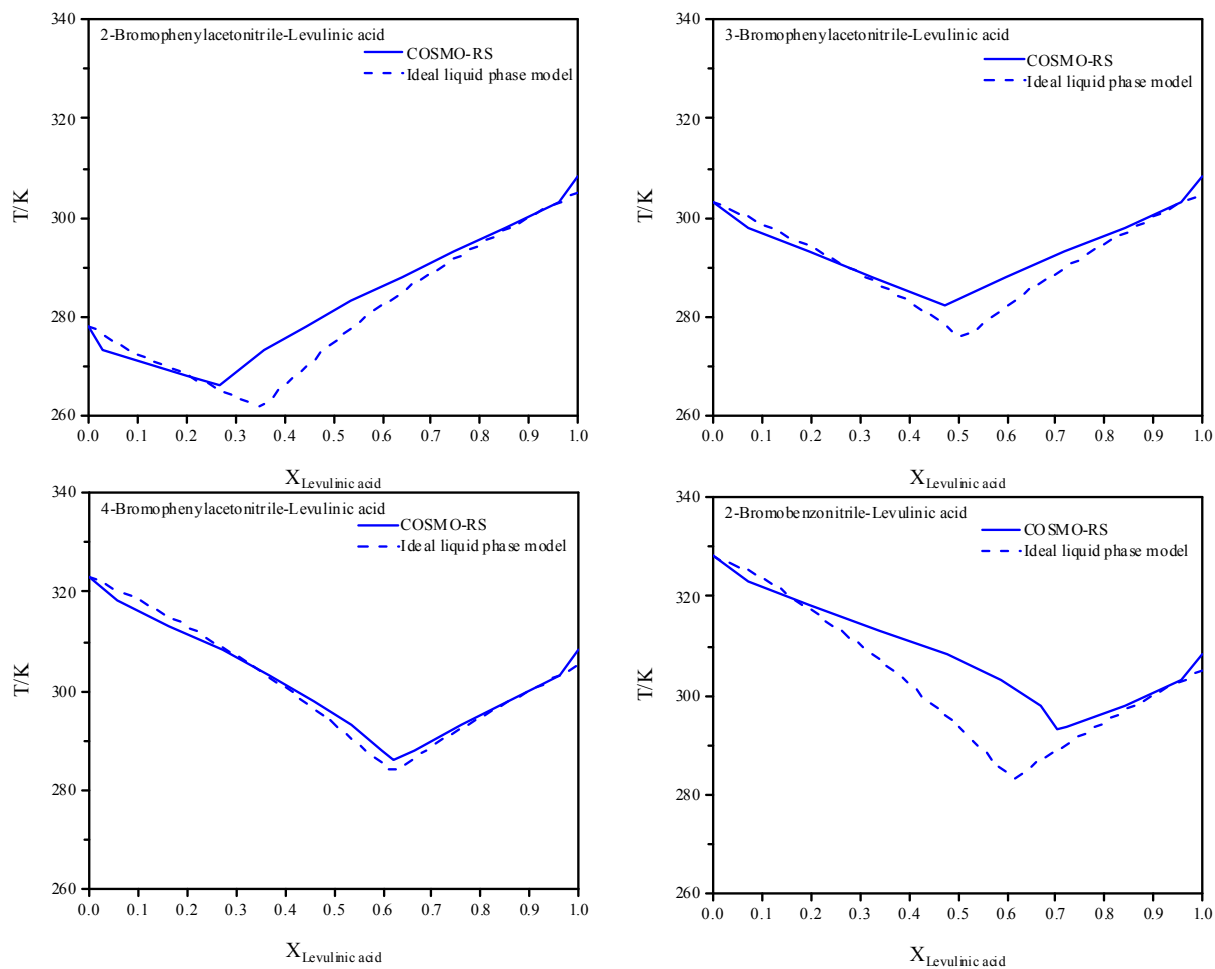

**Figure S2.** Solid-liquid equilibrium phase diagrams predicted by the ideal liquid phase model (dashed line) and by COSMO-RS (solid lines).
